# Supplementary material for: The value of Bayesian predictive projection for variable selection: An example selecting lifestyle predictors of young adult well-being
Source: Research Square preprint supplement (doi:10.21203/rs.3.rs-28472/v2), 2021-01-11
Supplement: Supplementary file 1 [file 6d950ece4dcc1f8a3c3dadbd.docx]

**Appendix A:**

For data wrangling and visualization, we used the tidyverse package (H. Wickham, 2017). For general-purpose Bayesian modelling, we used the brms (Bürkner, 2017) – a package that provides an accessible interface to the state-of-the-art Bayesian statistical programming language Stan (Carpenter et al., 2017). For predictive projection feature selection, we used the projpred package (Piironen et al., 2018). For Pareto-smoothed importance sampling leave-one-out cross-validation (PSIS-LOO), we used the loo package (Vehtari et al., 2017), and for model checking and visualization, we used the bayesplot package (Gabry et al., 2019). Additional packages used include pander (Daróczi & Roman, 2018), naniar (Tierney et al., 2020), cowplot (Wilke, 2019), ggcorrplot (Kassambara, 2019), and labelled (Larmarange, 2020)
